# Supplementary material
Source: PubMed Central journal article supplement (PMC3739690)
Supplement: NIHMS501506-supplement-Supplementary_Data.pdf [file NIHMS501506-supplement-Supplementary_Data.pdf]

Supplementary Materials (SM)

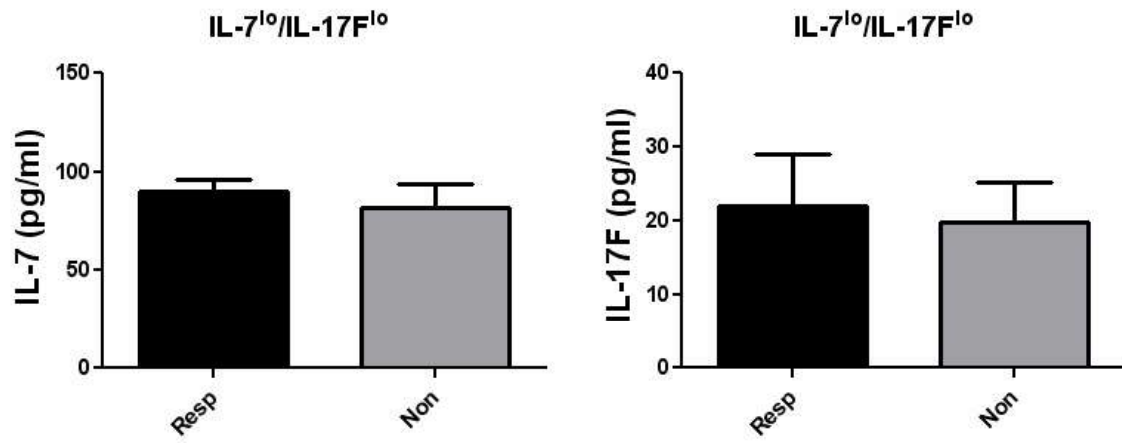

Figure S1. Levels of IL-7 or IL-17F do not differentiate responsiveness in the  $IL-17F^{lo}/IL-7^{lo}$  group.

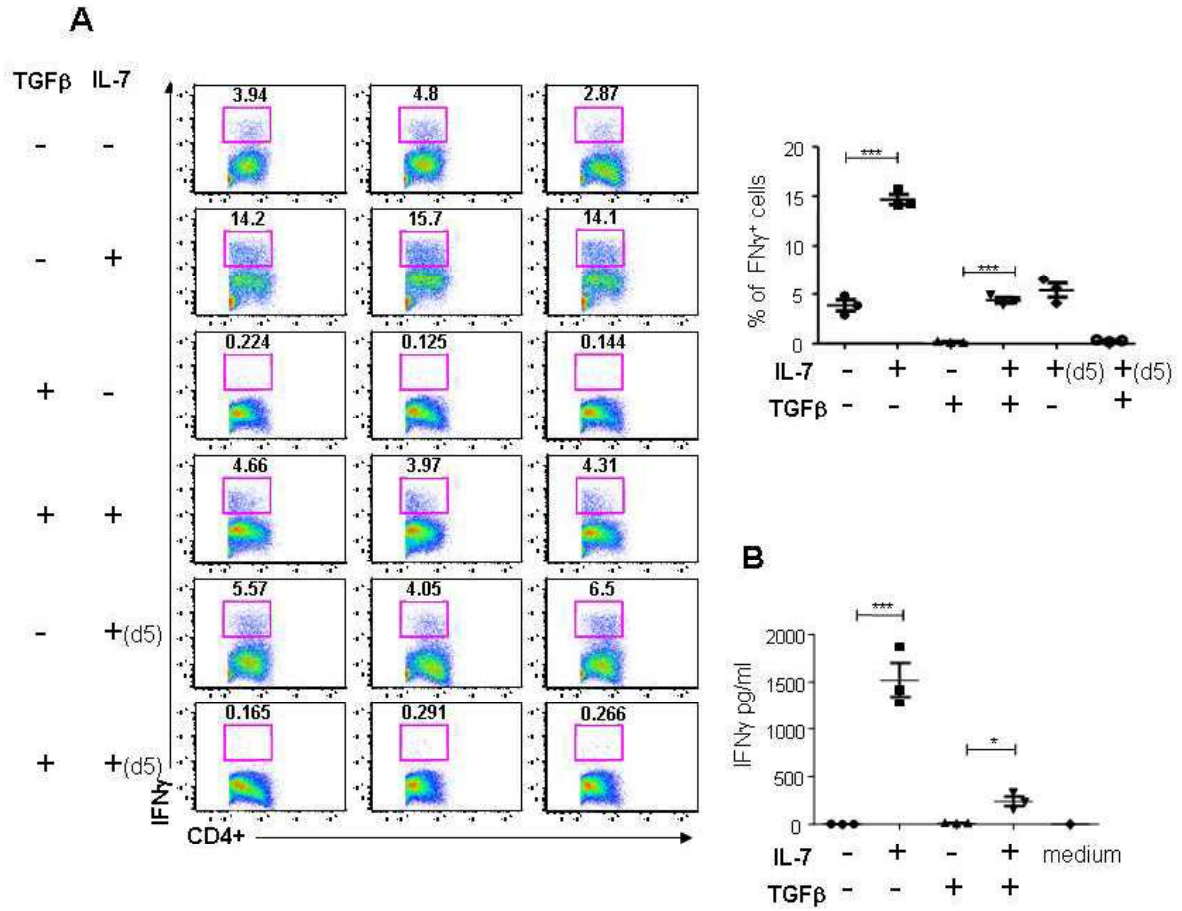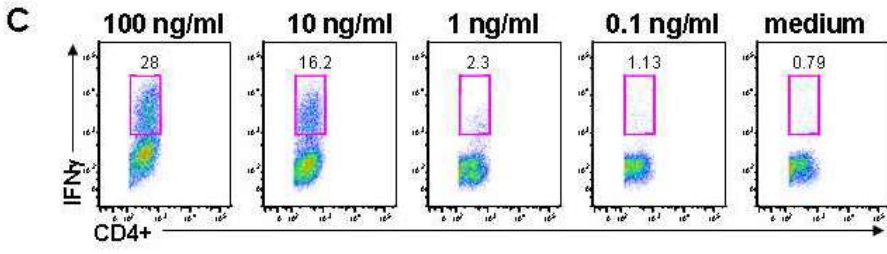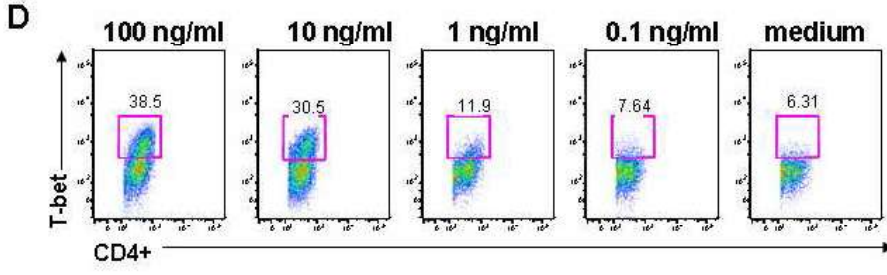

**E**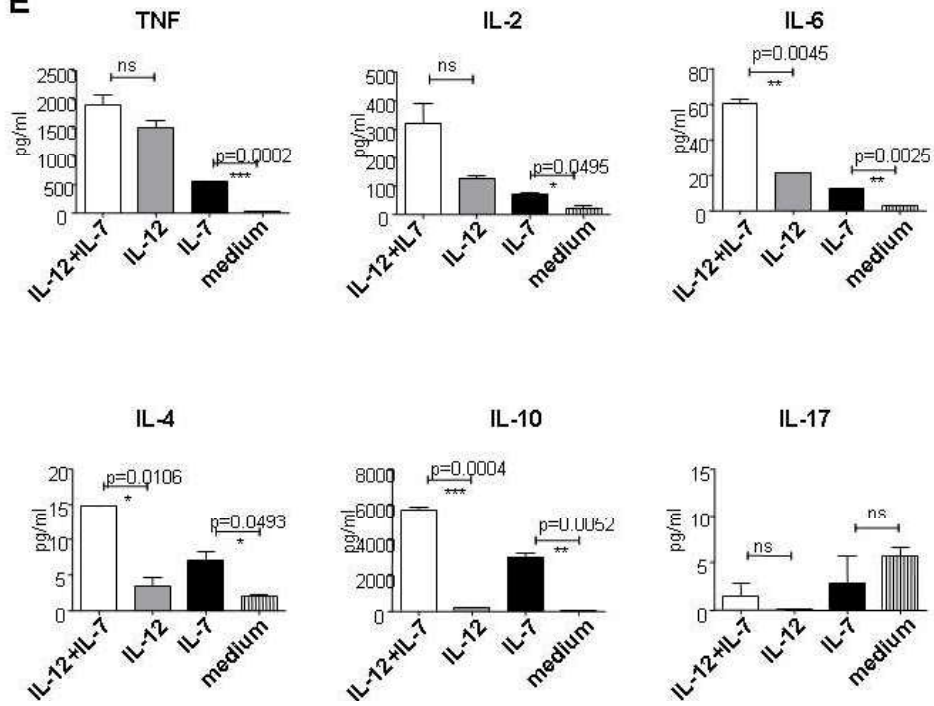**F**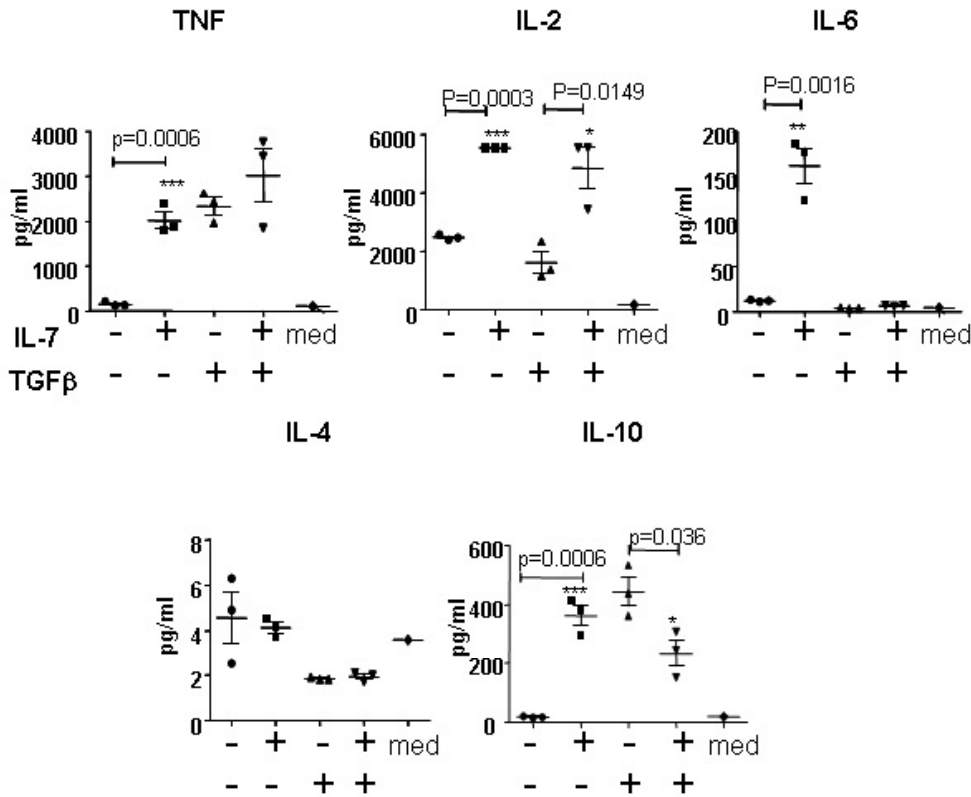

**Figure S2. IL-7 promotes T<sub>H</sub>1 cell differentiation from human naïve CD4<sup>+</sup> T cells.** (A) Intracellular staining of IFN $\gamma$  in naïve cord blood CD4<sup>+</sup> T cells activated with antibodies to CD3 and CD28 and a combination of IL-1 $\beta$ , IL-23 and with or without TGF- $\beta$  and with or without IL-7, analyzed on day 6. (B) IFN $\gamma$  production from the cultures as described above by Cytometric bead assay (CBA). Data are representative of at least three independent donors. (C) Dose-dependent effect of IL-7 on (C) IFN $\gamma$  and (D) T-bet producing cells in CD4<sup>+</sup> T cells. Intracellular staining of (C) IFN $\gamma$  and (D) T-bet in cord blood sorted naïve CD4<sup>+</sup> T cells activated with 0.1, 1, 10 or 100 ng/ml of hIL-7 in the absence of hIL-12. (E) Cytometric bead assay (CBA) of Th1/Th2/Th17 cytokine production by naïve cord blood CD4<sup>+</sup> T cells activated with antibodies to CD3 and CD28 and IL-12 in the absence or presence of IL-7 or IL-7 alone. (F). CBA of Th1/Th2 cytokine production by naïve cord blood CD4<sup>+</sup> T cells activated with antibodies to CD3 and CD28 and a combination of IL-1 $\beta$ , IL-23 and with or without TGF- $\beta$  and with or without IL-7 as indicated, analyzed on day 5. The mean percentage  $\pm$  SEM (n=3 experiments) of cytokine is given and statistics were performed using a student's t test

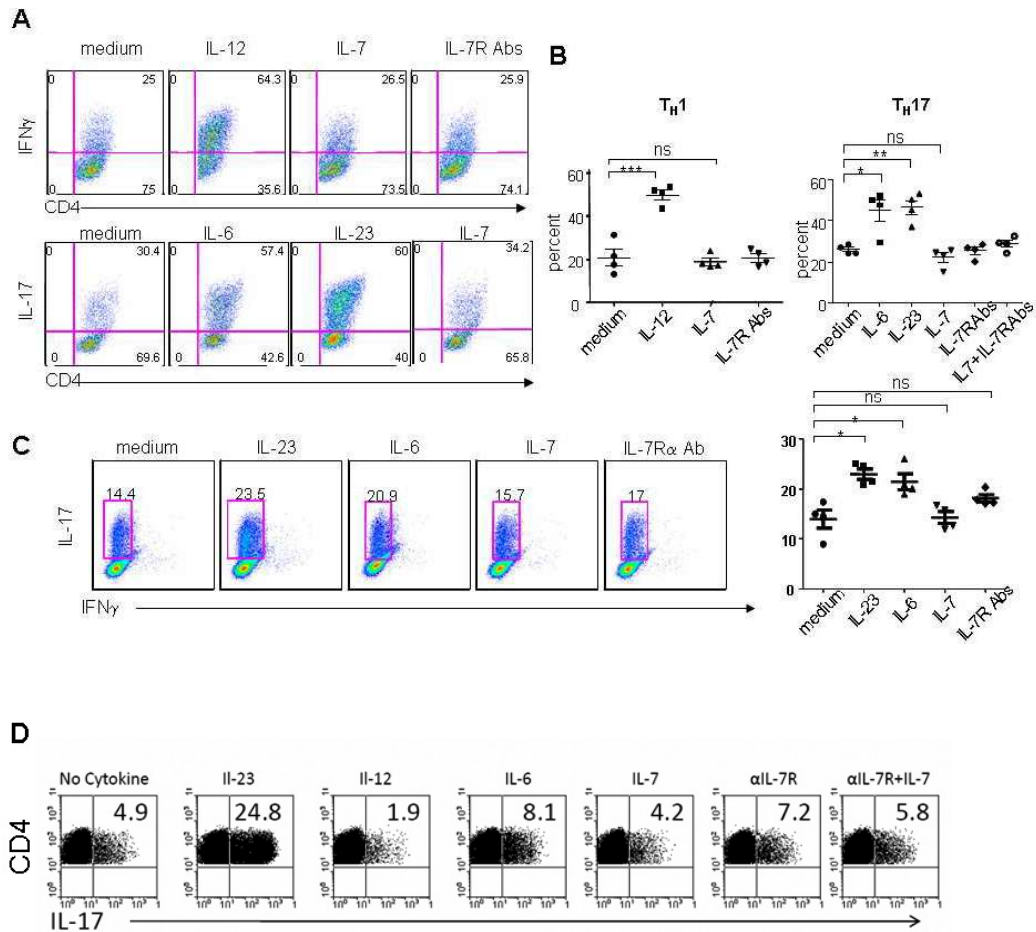

**Figure S3. IL-7 is not required for T<sub>H</sub>1 or T<sub>H</sub>17 cell expansion from immunized 2D2 CD4<sup>+</sup> T cells.** (A,B) Frequency of CD4<sup>+</sup> lymphocytes expressing IFN $\gamma$  and IL-17. CD4<sup>+</sup> splenic T cells from immunized 2D2 mice were activated in the presence of MOG35-55 plus the respective T<sub>H</sub>1 (upper) or T<sub>H</sub>17 (bottom) polarizing conditions. After T<sub>H</sub>1 or T<sub>H</sub>17 differentiation, cells were rested for 48 hrs followed by re-stimulation with MOG35-55 in the presence or absence of IL-12, IL-7, IL-6, IL-23 or IL-7R $\alpha$ -specific antibody as indicated during expansion period. (B) Quantification of IFN $\gamma$  and IL-17 produced CD4<sup>+</sup> T cells from immunized 2D2 mice in the presence or absence of IL-7 during expansion. (C) Purified CD4<sup>+</sup> T cells from MOG-immunized 2D2 mice were cultured with the

indicated cytokines for 72 hr and analyzed for the percentage of IL-17 producing cells (right). Quantification of IL-17 produced CD4<sup>+</sup> T cells in the presence or absence of IL-7 during expansion (left). (D) Frequency of CD4<sup>+</sup> lymphocytes expressing IL-17. CD4<sup>+</sup> splenic T cells from immunized 2D2 mice were activated in the presence of MOG35-55 plus T<sub>H</sub>17 polarizing conditions. After T<sub>H</sub>17 differentiation, cells were rested for two days followed by re-stimulation with MOG35-55 in the presence or absence of IL-12, IL-7, IL-6, IL-23 or IL-7R $\alpha$ -specific antibody as indicated during expansion period. Data are representative of three experiments. The mean percentage  $\pm$  SEM of cytokine-positive cells is given. Each experiment is comprised of four to five mice per group. \*p<0.05, \*\*p<0.01, \*\*\*p<0.001.

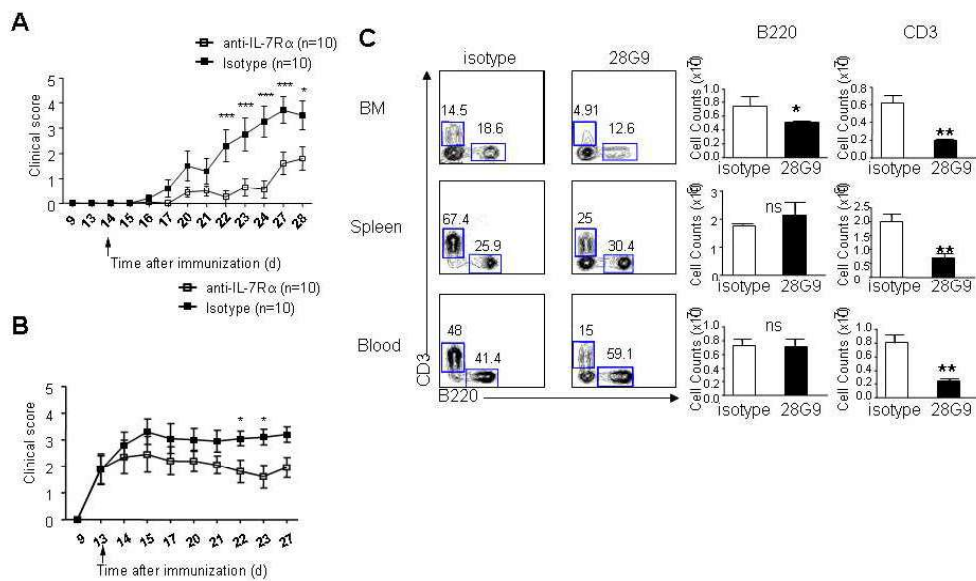

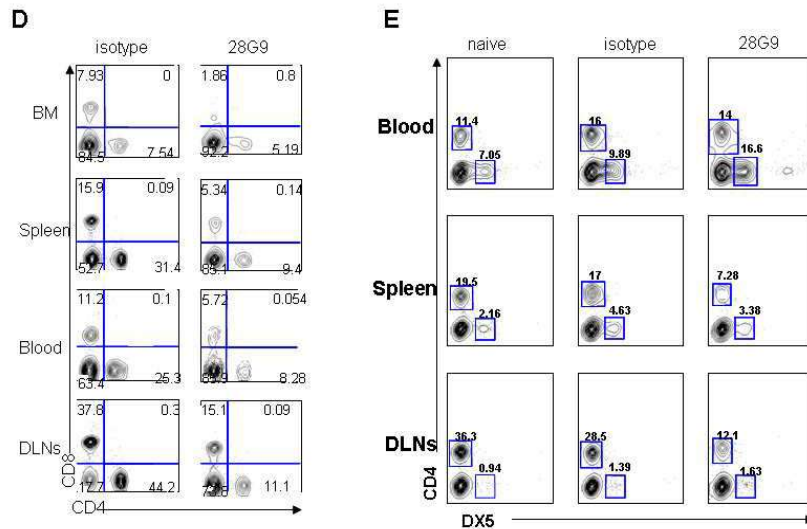

**Figure S4. Antibody specific to IL-7R $\alpha$  is efficacious in EAE either before or after symptom onset.** (A) Clinical scores of MOG-induced EAE mice treated with IL-7R $\alpha$ -specific antibody (3 mg/kg, anti-I IL-7R $\alpha$ ) or isotype control once weekly started from day 14 before symptom onset as indicated by arrow. (B) Clinical score of PLP-induced EAE in SJL mice treated with 10 mg/kg of anti-IL7R $\alpha$  from day 13 after symptom onset in PLP-induced twice weekly after immunization as indicated by arrow. \*P<0.05, \*\*\*P<0.001. Error bars represented mean  $\pm$  SEM. Statistics were performed using one way ANOVA. (C-E) IL-7R $\alpha$ -specific antibody reduced CD4<sup>+</sup> and CD8<sup>+</sup> T cells but preserved B and NK cells. (C-D) T and B cells from mice treated with IL-7R antibody by FACS staining and total cell counts. Cells were isolated from bone marrow (BM), spleen, blood or draining lymph nodes (DLN) of EAE mice treated with isotype control or 28G9 at day 21 after immunization. FACS analysis was performed in total cells using (C) CD3 and B220 antibodies or (D) CD4 and CD8 antibodies. (C) Total cell counts of T and B cells from 3 independent experiments with n =3 mice for each experiment. \*P<0.01.

(D) Percentages of CD4<sup>+</sup> and CD8<sup>+</sup> in bone marrow (BM), spleen, blood and draining lymph nodes (DLNs). (E) NK cells from mice treated with IL-7R antibody by FACS staining Cells were isolated from spleen, blood or draining lymph nodes (DLN) of EAE mice treated with isotype control or 28G9 at day 21 after immunization. FACS analysis was performed in total cells using CD4 and DX5 antibodies.

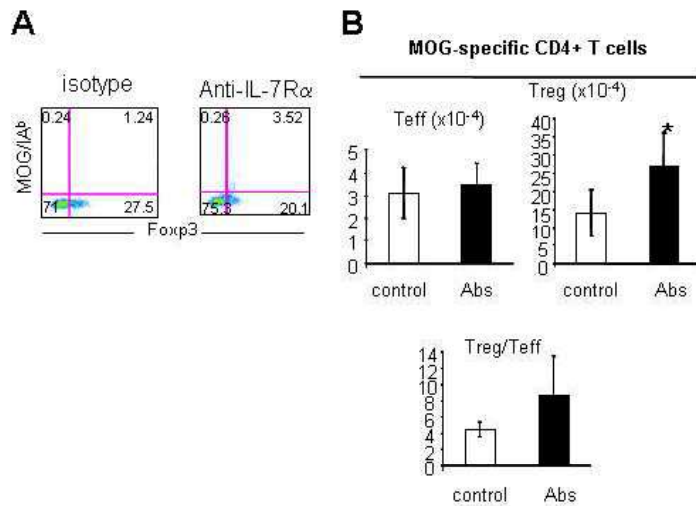

**Figure S5. IL-7R $\alpha$  antibody treatment does not affect T<sub>reg</sub> numbers from lymph nodes.**

(A) Representative FACS showing MOG-specific T cells following antibody or control antibody treatments at day 7 post-treatment as determined by FACS. CD4<sup>+</sup> T cells were staining with MOG/IAb or control tetramers and Foxp3. Representative MOG-specific T<sup>eff</sup> (MOG/IAb-tetramer<sup>+</sup>CD4<sup>+</sup>FoxP3<sup>-</sup>) and T<sub>reg</sub> (MOG/IAb-tetramer<sup>+</sup>CD4<sup>+</sup>FoxP3<sup>+</sup>) frequencies are shown within the indicated CD4<sup>+</sup> T cell quadrants. Numbers indicate percentages of CD4<sup>+</sup> T cells within each quadrant. (B) Bar graphs indicate numbers (mean  $\pm$  SEM,  $n \geq 3$  experiments) of T<sub>eff</sub> and T<sub>regs</sub>, and the ratio of T<sub>eff</sub>/T<sub>regs</sub> following antibody (black bars) or control antibody (white bars) treatments; \* $P < 0.05$ .



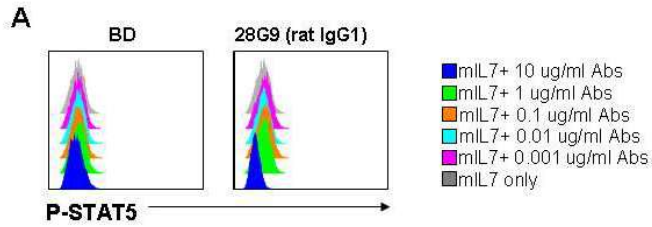

**Figure S6. Dose response of p-STAT5 by 28G9 or SB/14.** Different concentration of antibody was added as indicated in the presence of IL-7 (1ng/ml). Splenocyte from wild type mice were subjected to the stimulation of 1 ng of mouse IL-7 protein in the presence or absence of different anti-IL7R $\alpha$  antibodies. Cells were simultaneously stained with CD11b-FITC, TCR $\beta$ -PE, B220-Cy5.5PerCP, and pStat5 (Y694).

| Analyte       | p-value t-test |
|---------------|----------------|
| PDGFBB        | 0.015          |
| IL-7          | 0.028          |
| TGF $\beta$   | 0.063          |
| IFN $\beta$   | 0.080          |
| IL-13         | 0.084          |
| IL-7F         | 0.086          |
| EOTAXIN       | 0.086          |
| IL-1 $\alpha$ | 0.089          |
| MCP-3         | 0.098          |
| LIF           | 0.146          |

**Table S1. P values for the top 10 analytes for prediction of outcome and responder versus nonresponder to IFN- $\beta$ .** Measured in a sample of 26 patients with relapsing remitting MS. These p-values are from a two-tailed Student's t-test. Samples were analyzed as described in methods with the Luminex cytometer on the ProCarta50 plexmulti-analyte array.

| Analyte     | P value t-test |
|-------------|----------------|
| PDGFBB      | 0.015          |
| IL-7        | 0.028          |
| TGF $\beta$ | 0.063          |

|               |       |
|---------------|-------|
| IFN- $\beta$  | 0.080 |
| IL-13         | 0.084 |
| IL-17F        | 0.086 |
| EOTAXIN       | 0.086 |
| IL-1 $\alpha$ | 0.089 |
| MCP-3         | 0.098 |
| LIF           | 0.146 |

**Table S2. The effect of different cytokines on mouse T<sub>H</sub>1 and T<sub>H</sub>17 cell expansion under T<sub>H</sub>17-polarizing conditions.**

Primary Stim  
  
 TH17

|                 | media | IL-23 | IL-12 | IL-6 | IL-7 | $\alpha$ IL-7R | $\alpha$ IL-7R +IL-7 |
|-----------------|-------|-------|-------|------|------|----------------|----------------------|
| %IL-17+         | 24.8  | 55.6  | 6.6   | 37.6 | 20.5 | 29.5           | 24.5                 |
| %IFN $\gamma$ + | 2.7   | 1.3   | 36.6  | 1.7  | 3.0  | 3.2            | 3.2                  |

**Table S3. The binding interaction between mouse Fc $\gamma$ R and 28G9 or SB/14 was evaluated with a Biacore biosensor (GE).**

|              | Fc $\gamma$ RI | Fc $\gamma$ RIIb | Fc $\gamma$ RIII |                |
|--------------|----------------|------------------|------------------|----------------|
| SB/14 rIgG2a | -              | -                | -                | + = binding    |
| 28G9 rIgG1   | ++             | ++               | +                | - = no binding |
